## CORRESPONDENCE

9. Stapco PW: Lactic acidosis. *Endo Metab Clin North Am* 1993; 22:221-44

10. Mizock BA, Falk JL: Lactic acidosis in critical illness. *Crit Care Med* 1992; 20:80-93

11. Lalau JD, Lacroix C, Compagnon P, Cagny B, Rigaud JP, Bleichner G, Chauveau P, Dulbecco P: Role of metformin accumulation in metformin-associated lactic acidosis. *Diabetes Care* 1995; 18:779-84

12. Lambert H, Isnard F, Delorme N, Claude D, Bollaert PE, Straczek J, Larean A: Approche physiopathologique des hyperlactatemies pathologiques chez le diabetique. *Ann Fr Anesth Reanim* 1987; 6:88-94

13. McMurray JF: Wound healing with diabetes mellitus. *Surg Clin North Am* 1984; 64:769-78

(Accepted for publication February 23, 1998.)

Anesthesiology

1998; 89:267

© 1998 American Society of Anesthesiologists, Inc.

Lippincott-Raven Publishers

## Specific Therapies of Biguanide-induced Lactic Acidosis

*To the Editor:*—Mercker *et al.*<sup>1</sup> reported a case of severe biguanide-induced lactic acidosis. However, the authors did not discuss specific therapies. In such case, the administration of sodium dichloroacetate (DCA) should have been considered. DCA is an antidiabetic agent that activates the pyruvate dehydrogenase complex, the mitochondrial enzyme that catalyzes the conversion of pyruvate to acetyl-coenzyme A and carbon dioxide. In dogs DCA has been reported to correct lactic acidosis induced by phenformin, another biguanide that induces lactic acidosis more commonly.<sup>2</sup> In the patient described, an ongoing infection could have contributed to the overproduction of lactate. Even in endotoxin-induced lactic acidosis, DCA administration has been shown to reduce blood lactate levels.<sup>3,4</sup> Administration of DCA could reduce plasma lactate levels in patients with lactic acidosis caused by various etiologies, even though in a large clinical trial, such intervention did not improve survival rates.<sup>5</sup>

**Jean-Charles Preisser, M.D.**  
**Jean-Louis Vincent, M.D., Ph.D.**  
 Department of Intensive Care  
 Erasme University Hospital  
 Route de Lennik 808  
 B-1070 Brussels  
 Belgium

## References

1. Mercker SK, Maier C, Neumann G, Wulf H: Lactic acidosis as a serious perioperative complication of antidiabetic biguanide medication with metformin. *ANESTHESIOLOGY* 1997; 87:1003-5

2. Park R, Arief AI: Treatment of lactic acidosis with dichloroacetate in dogs. *J Clin Invest* 1982; 70:853-62

3. Preiser JC, Moulart D, Vincent JL: Dichloroacetate administration in the treatment of endotoxin shock. *Circ Shock* 1990; 30:221-8

4. Curtis SE, Cain SM: Regional and systemic oxygen delivery/uptake relations and lactate flux in hyperdynamic, endotoxin-treated dogs. *Am Rev Respir Dis* 1992; 145:348-54

5. Stacpoole PW, Wright EC, Baumgartner TG, Bersin RM, Buchalter S, Curry SH, Duncan CA, Harman EM, Henderson GN, Jenkinson S, Lachin SM, Lorenz A, Schneider SH, Siegel SM, Summer SW, Thompson D, Wolfe CL, Zorovich DM: A controlled clinical trial of dichloroacetate for treatment of lactic acidosis in adults. *N Engl J Med* 1992; 327:1564-9

(Accepted for publication February 23, 1998.)

Anesthesiology

1998; 89:267-8

© 1998 American Society of Anesthesiologists, Inc.

Lippincott-Raven Publishers

*In Reply:*—We appreciate the interest and comments of our colleagues regarding our case report and would like to thank the editorial board for the opportunity to respond.

We agree with Lustik *et al.* that a patient's diabetes mellitus should be under good control perioperatively. Therefore we would not stop metformin administration without starting an alternative therapy if appropriate.

Nevertheless, we are much more concerned about perioperative metformin medication than Lustik *et al.* are. The patient mentioned

in our case report was treated according to the recommendations suggested by Lustik *et al.* He presented no contraindications for metformin (except low caloric input) until he developed severe lactic acidosis. Therefore stopping metformin could prevent a rare, but significant, risk for the patient, whereas the potential benefits of continuing the drug are rather vague.

According to the new manufacturer's recommendations in Germany, metformin should be omitted 2 days before and after general anesthesia. The risk to develop perioperative problems that would



## CORRESPONDENCE

represent a contraindication for metformin medication (insufficiency of cardiovascular, pulmonary, or renal function; infections; catabolic metabolism) does not differ significantly if operations of the same size are performed in regional anesthesia. In case of ambulatory surgery we have concerns, and the development of contraindications might proceed unnoticed.

Although we agree with Lustik *et al.* regarding the importance of good diabetic control, we prefer to continue our rather restrictive practice of perioperative metformin therapy.

Sodium dichloroacetate (DCA), as proposed by Preiser and Vincent, could be an interesting future option for the therapy of lactic acidosis, especially because it could provide more than just symptomatic therapy.

However, DCA does not belong to the standard therapy of biguanide-induced lactic acidosis. Further, the clinical trials Preiser and Vincent refer to do not suggest DCA to be a magic bullet. Because

metformin-induced lactic acidosis is a rare phenomenon and our personal experience is limited, we did not consider a therapy besides the recommended standards in this case.

**Hinnerk Wulf, M.D.**

**Stephanie Mercker, M.D.**

**Christoph Maier, M.D.**

**Günther Neumann, M.D.**

Klinik für Anesthesiologie und Operative Intensivmedizin der  
Chr.-Albrechts-Universität Kiel

Schwanenweg 21

D-24105 Kiel

Germany

wulf@anaesthesie.uni-Kiel.de

(Accepted for publication February 23, 1998.)

Anesthesiology

1998; 89:268-9

© 1998 American Society of Anesthesiologists, Inc.

Lippincott-Raven Publishers

## Implementation of Pharmaceutical Practice Guidelines— Once Again

*To the Editor:*—In a recent Letter to the Editor<sup>1</sup> in response to an article by Lubarsky *et al.*<sup>2</sup> I pointed out that anesthetic agents and muscle relaxants may have a significant effect that lasts beyond the PACU period, and therefore an investigation of the effect of practice guidelines on clinical outcome and cost-benefit analyses should include the period *after* the patients are discharged to the ward. I referred to our recent prospective, randomized, controlled study of postoperative pulmonary complications (POPC) after the use of pancuronium, atracurium, and vecuronium in nearly 700 patients.<sup>3,4</sup> We found that not only was the incidence and the degree of residual block in the PACU significantly increased in the pancuronium group, but also significantly more patients in this group developed POPC in the ward (16.9%) compared with the two other groups (5.4%).

In Dr. Lubarsky's response, he argued that the practice guidelines he proposed regarding the use of pancuronium are sound as long as enough medication is administered to achieve appropriate reversal, and "that reversal should be monitored by standard train-of-four monitoring, making sure a twitch is present before reversal, and one should assess the ability to sustain tetanus for 5 s in addition to having 4/4 twitches of near equal magnitude (>07, T4/T1)."

The problem is that during routine anesthesia given by anesthesiologists without any special interest in neuromuscular blocking agents, residual neuromuscular block after long-acting neuromuscular blocking agents is *not* eliminated using routine clinical tests and tactile or visual evaluation of the response to train-of-four or tetanic stimulation as described by Lubarsky.<sup>5,6</sup> It is *not* possible manually or visually to judge the degree of train-of-four or tetanic fade (50 Hz) with sufficient certainty to exclude residual block<sup>7-10</sup> (Viby-Mogensen *et al.*, unpublished observation). In studies claiming the opposite, the anesthesiologists

evaluating the response to train-of-four nerve stimulation were dedicated and experienced observers.<sup>11,12</sup> To exclude clinically significant residual neuromuscular block after the use of the long-acting neuromuscular blocking agents during routine anesthesia, more objective methods of monitoring such as mechanomyography, electromyography, acceleromyography, or possibly double burst stimulation must be applied.<sup>13-15</sup>

Dr. Lubarsky claims that our patients received an inadequate dose of neostigmine. It may or may not be so in some cases, although this is not the issue. The issue is that the anesthesiologists in our study were instructed to do their best to avoid residual neuromuscular block. They were instructed to aim at a level of neuromuscular block during surgery corresponding to one or two responses after train-of-four stimulation, as proposed by Lubarsky *et al.* A minimum of two responses was required to be present before initiation of reversal. Reversal was induced with neostigmine, 2.5 mg, but supplementary doses of neostigmine, 1.25 mg, could be given up to a total of 5 mg, if judged necessary by the anesthesiologists. Tracheal extubation was performed when four equal responses were felt after train-of-four stimulation and when clinically sufficient respiration was judged to be present. So once again it was documented that during routine anesthesia, clinical evaluation with manual evaluation of the train-of-four response does not exclude residual neuromuscular block after pancuronium.

On the basis of the previous, it is difficult for me to accept the conclusion of Lubarsky *et al.*: the routine use of the long-acting agent pancuronium did not adversely influence outcome. Lubarsky *et al.* have not convincingly documented by objective methods that their patients did not have residual neuromuscular block in the recovery
